# Supplementary material
Source: publisher figshare collection journal article supplement (https://gsapubs.figshare.com/ndownloader/files/30419334)
Supplement: Supplementary file 1 [file 30419334]

## Sheet: Sheet1
TABLE S3: Rb-Sr AND Sm-Nd ISOTOPE DATA
Sample	Type	Formation	Unit		Rb	Sr	87Rb/86Sr	87Sr/86Sr		Sm	Nd	147Sm/144Nd	143Nd/144Nd		Age (Ma)	epsilon Ndt	initial Nd	TDM	initial Sr
SL 18-77	D-MORB	Mostadmarka			<5	342	0.0423051	0.705406		2.03	5.69	0.215717	0.513167		472	9.18315	0.5125	-1295.4	0.705127
TGR16_330	D-MORB	Mostadmarka			<5	362	0.0399654	0.704797		4.11	11.2	0.221879	0.513084		472	7.19009	0.512398	33955.6	0.704533
ST9-76	D-MORB	Mostadmarka			5	281	0.0514849	0.704635		4.48	12.1	0.223864	0.513077		472	6.93353	0.512385	-3065.01	0.704295
ST 6-76	T-MORB	Mostadmarka			<5	297	0.048708	0.703932		4.94	16.1	0.185516	0.512961		472	6.98351	0.512387	639.887	0.703611
ST 8-76	T-MORB	Mostadmarka			<5	263	0.0550085	0.704615		5.33	17.3	0.186284	0.513087		472	9.39797	0.512511	115.546	0.704252
TGR17_29	T-MORB	Mostadmarka			<5	307	0.0471248	0.704671		5.01	17.2	0.176109	0.512872		472	5.81336	0.512328	804.2	0.70436
TGR14_227	T-MORB	Fjellvollen	Svartvatna		5	167	0.086645	0.706369		5.2	19	0.165471	0.512891		465	6.79858	0.512387	602.01	0.705806
TGR_438	E-MORB	Mostadmarka			<5	282	0.0512972	0.703613		6.48	24.9	0.157339	0.512762		472	4.79837	0.512276	830.121	0.703275
SL 17-77	E-MORB	Mostadmarka			<5	207	0.0698862	0.704054		6.04	24.1	0.151525	0.512806		472	6.00873	0.512338	666.793	0.703593
SL 5-77	E-MORB	Mostadmarka			19	255	0.215709	0.71025		7.65	30.9	0.149679	0.512748		472	4.98744	0.512285	771.87	0.708827
SL15-77	E-MORB	Mostadmarka			5.1	316	0.0466965	0.704279		6.16	28	0.133007	0.512693		472	4.91993	0.512282	721.648	0.703971
TGR16_305	Th-rich	Mostadmarka	Gragjelfjellet		164	211	2.25494	0.731915		16.6	111	0.0903989	0.511958		472	-6.86198	0.511679	1337.27	0.71704
TGR19_28	Th-rich	Mostadmarka	Gragjelfjellet		71	237	0.868256	0.721615		16.9	119	0.0858451	0.511939		472	-6.9581	0.511674	1313.89	0.715887
TGR19_29	Th-rich	Mostadmarka	Gragjelfjellet		71	264	0.779532	0.722603		15.2	103	0.0892034	0.511932		472	-7.29759	0.511656	1354.96	0.717461
TGR19_30	Th-rich	Mostadmarka	Gragjelfjellet		236	182	3.76475	0.739483		14.5	98	0.089437	0.511933		472	-7.29216	0.511656	1356.2	0.714648
TGR16-43	Th-rich	Mostadmarka	Vertjønna		12	133	0.261215	0.710567		7.48	41	0.110282	0.512032		470	-6.63939	0.511692	1473.77	0.708851
TGR18_9	Th-rich	Fjellvollen	Jorlisætra		226	173	3.79169	0.73655		23.8	178	0.0808216	0.511886		470	-7.71953	0.511637	1324.25	0.711644
TGR15_408	Th-rich	Fjellvollen	Bolhøgdin		50	213	0.680004	0.716517		18.7	92.7	0.121939	0.511998		470	-8.00432	0.511623	1695.95	0.71205
TGR19_11	Th-rich	Fjellvollen	Bolhøgdin		32	161	0.575671	0.714848		17.4	86	0.122303	0.512058		470	-6.85441	0.511681	1611.08	0.711067
Note: Rb-Sr isotopic compositions for samples with Rb concentrations below the detection limit (5 ppm) have been calculated assuming a value equal to the detection limit.
This only affects the fourth decimal in the initial Sr value.
